# Supplementary material
Source: publisher site journal article supplement (https://www.degruyterbrill.com/publication/isbn/9783110364231/downloadAsset/9783110364231_Inhaltsverzeichnis.pdf)
Supplement: Supplementary file 1 [file 9783110364231_Inhaltsverzeichnis.pdf]

# Inhaltsverzeichnis

Vorwort — VII

Verzeichnis der Siglen und textkritischen Zeichen — XIII

0. Einleitung — 1

## 1. Teil: Philosophie als Text

- 1.1. Terminologische Grundlagen: Text, Werk, Literarizität und ästhetische Darstellungsform — **13**
- 1.2. Methodenreflexion I: Poeseologie des philosophischen Schreibens — **39**

## 2. Teil: Nietzsche

- 2.1. Voraussetzungen oder warum wie zu lesen sei — **55**
- 2.1.1. Voraussetzungen I: Zur Bedeutung der Textualität von Nietzsches Philosophie — **55**
- 2.1.2. Voraussetzungen II: Nietzsches schriftstellerische Methoden im Kontext seines späten (Sprach-)Denkens — **77**
- 2.1.2.1. Zur Problematik der Verabsolutierung von Nietzsches früher Sprachauffassung: Paul de Mans Nietzsche-Interpretation — **77**
  - a.) Paul de Mans Lektüre von W II 6, S. 61/59 — **80**
  - b.) De Mans ‚blinder Fleck‘ – Nietzsches spätes Sprachdenken — **83**
  - c.) Das Verschwinden des Textes unter de Mans Interpretation — **89**
- 2.1.2.2. Ziele und Reichweite von Nietzsches poeseologischen Reflexionen — **94**
  - a.) Stil als Mittel der Leserauswahl — **95**
  - b.) Bedeutungserweiterung durch Rhythmisierung — **98**
  - c.) Von der Metareflexion zur intratextuellen Autoprofilierung — **100**
- 2.1.2.3. Charakteristika von Nietzsches philosophischen Schreibweisen — **108**
  - a.) Form als sedimentierter Inhalt — **108**
  - b.) Orientierung an der gesprochenen Sprache — **109**
  - c.) Graphematische Irritationspraxis — **109**
  - d.) Performative Brüche — **111**

- e.) Musikalisierung/Rhythmisierung — **112**
    - f.) Personalisierung — **112**
    - g.) Typisierung — **115**
    - h.) Rhetorische Figuren und Tropen — **116**
    - j.) Die Gattungsfrage — **117**
  - 2.1.3. Methodenreflexion II: Die Lektüremethode des autoreflexiven Lesens — **123**
  - 2.2. Die *Götzen-Dämmerung* — **142**
  - 2.2.1. Entstehungs- und editionsgeschichtliche Hintergründe der *Götzen-Dämmerung* — **142**
  - 2.2.2. „Meine[] wesentlichsten philosophischen Heterodoxien“. Philosophische Methoden und Leitmotive der *Götzen-Dämmerung* — **145**
  - 2.2.2.1. Methoden und Leitmotive I: Heterodoxes Denken — **145**
  - 2.2.2.2. Methoden und Leitmotive II: Heuristik in Tropen (GD Vorwort) — **152**
    - a.) Telos und Darstellungsmodus – Erholung von der Aufgabe der Umwertung durch Stiftung von Heiterkeit — **154**
    - b.) Krieg als heuristische Methode — **156**
    - c.) Der Untersuchungsgegenstand – Fall und Götze — **163**
    - d.) Hammer und Stimmgabel als Instrumente psychologischer Kritik — **163**
    - e.) Motivverknüpfung – Kriegserklärung an die ewigen Götzen — **168**
  - 2.2.2.3. Methoden und Leitmotive III: Der Fall Sokrates (GD Sokrates) — **170**
    - a.) Symptomatologie als Kritik — **171**
    - b.) Vom Symptom zum Zeichen – der sprachphilosophische Hintergrund — **174**
    - c.) Der Gegenstand der Kritik – die *décadence* — **180**
    - d.) Die ‚Instinkte‘ – der physiologische Hintergrund — **185**
    - e.) Ausbruch als Rückkopplung – Sokrates’ Missverständnis — **188**
    - f.) Zusammenfassung – Philosophie als Erzählung und Figurenrede — **191**
  - 2.2.3. Textlektüre von „Die ‚Vernunft‘ in der Philosophie“ — **195**
  - 2.2.3.1. GD Vernunft 1 — **195**
  - 2.2.3.2. GD Vernunft 2 — **210**
  - 2.2.3.3. GD Vernunft 3 — **217**
  - 2.2.3.4. GD Vernunft 4 — **223**
  - 2.2.3.5. GD Vernunft 5 — **230**
  - 2.2.3.6. GD Vernunft 6 — **249**
  - 2.2.4. Autodeixis, Schleife und Selbstparodie: Nietzsches subvertierende Schrift — **266**
  - 2.2.4.1. Stand der Forschung — **266**

- 2.2.4.2. Autodeiktische Schleife (GD Sokrates, GD Vernunft) — **281**
- 2.2.4.3. Ernste Selbstparodie (GD Moral) — **288**
- 2.2.4.4. Performative Schleife (GD Verbesserer) — **300**
- 2.2.4.5. Selbstbezüglichkeitsfiguren in der GD (Überblick) — **305**
- 2.2.5. Das Dionysische als physio-ästhetisches Mythopoem und poeseologische Metapher — **306**

### **3. Teil: Text, Konstellation und (Selbst-)Reflexion: Die ästhetischen Darstellungsformen der *Götzen-Dämmerung* und ihre Folgen für Philosophie und Literaturtheorie**

- 3.1. Der Status der Darstellungsform in aktuellen literaturtheoretischen und philosophischen Diskursen — **329**
- 3.1.1. Erkenntnis und Darstellung, eine Frage der Zuständigkeit? Zum Verhältnis von Philosophie und Literatur — **330**
- 3.1.2. Der literaturtheoretisch-ästhetische Diskurs — **334**
- 3.1.3. Der philosophische Diskurs — **343**  
Exkurs: Die Darstellungsformen der *Götzen-Dämmerung* im Lichte der „Erkenntniskritischen Vorrede“ von Walter Benjamins *Ursprung des deutschen Trauerspiels* — **348**
- 3.2. Philosophie als ästhetischer Text: Epistemische und epistemologische Konsequenzen der Darstellungsformen der *Götzen-Dämmerung* — **366**

### **4. Literaturverzeichnis — 377**

### **5. Abbildungen — 392**

- 5.1. Aufzeichnungen und ‚Vorstufen‘ aus dem späten Nachlass — **392**
- 5.2. Druckmanuskript — **413**
- 5.3. Erstausgabe 1889 — **418**
